# Supplementary material for: Understanding the Function of a Locus Using the Knowledge Available at Single-Nucleotide Polymorphisms
Source: Preprints.org preprint supplement (doi:10.20944/preprints202108.0084.v1), 2021-08-03
Supplement: Supplementary file 2 [file supplementary]

## Sheet: S1 Table
S1 Table. List of genomic variants within 5q15 chromosome band from ClinVar database that are reported to cause obesity/proprotein convertase 1/3 deficiency
Name	Condition(s)	Clinical significance (Last reviewed)	Accession	Chromosome	Location (GRCh37)
NM_000439.5(PCSK1):c.*2636C>T	Proprotein convertase 1/3 deficiency	Uncertain significance(Last reviewed: Jan 13, 2018)	VCV000907765	5	95726069
NM_000439.5(PCSK1):c.*2634G>A	Proprotein convertase 1/3 deficiency	Uncertain significance(Last reviewed: Jan 13, 2018)	VCV000907766	5	95726071
NM_000439.5(PCSK1):c.*2611A>G	Proprotein convertase 1/3 deficiency	Uncertain significance(Last reviewed: Jan 12, 2018)	VCV000907767	5	95726094
NM_000439.5(PCSK1):c.*2582A>G	Proprotein convertase 1/3 deficiency	Uncertain significance(Last reviewed: Jan 12, 2018)	VCV000907768	5	95726123
NM_000439.5(PCSK1):c.*2288A>G	Proprotein convertase 1/3 deficiency|Monogenic Non-Syndromic Obesity	Uncertain significance(Last reviewed: Jan 13, 2018)	VCV000354609	5	95726417
NM_000439.5(PCSK1):c.*2187G>A	Proprotein convertase 1/3 deficiency	Uncertain significance(Last reviewed: Jan 13, 2018)	VCV000907769	5	95726518
NM_000439.5(PCSK1):c.*2166C>T	Proprotein convertase 1/3 deficiency|Monogenic Non-Syndromic Obesity	Uncertain significance(Last reviewed: Jan 13, 2018)	VCV000354610	5	95726539
NM_000439.5(PCSK1):c.*2115G>A	Proprotein convertase 1/3 deficiency	Uncertain significance(Last reviewed: Jan 12, 2018)	VCV000907770	5	95726590
NM_000439.5(PCSK1):c.*2019A>G	Proprotein convertase 1/3 deficiency|Monogenic Non-Syndromic Obesity	Uncertain significance(Last reviewed: Jun 14, 2016)	VCV000354611	5	95726686
NM_000439.5(PCSK1):c.*1967C>T	Proprotein convertase 1/3 deficiency	Uncertain significance(Last reviewed: Jan 12, 2018)	VCV000904442	5	95726738
NM_000439.5(PCSK1):c.*1912G>A	Proprotein convertase 1/3 deficiency|Monogenic Non-Syndromic Obesity	Uncertain significance(Last reviewed: Jan 13, 2018)	VCV000354612	5	95726793
NM_000439.5(PCSK1):c.*1854T>A	Proprotein convertase 1/3 deficiency|Monogenic Non-Syndromic Obesity	Uncertain significance(Last reviewed: Jun 14, 2016)	VCV000354613	5	95726851
NM_000439.5(PCSK1):c.*1842G>A	Proprotein convertase 1/3 deficiency|Monogenic Non-Syndromic Obesity	Uncertain significance(Last reviewed: Jun 14, 2016)	VCV000354614	5	95726863
NM_000439.5(PCSK1):c.*1733G>A	Monogenic Non-Syndromic Obesity|Proprotein convertase 1/3 deficiency	Uncertain significance(Last reviewed: Jun 14, 2016)	VCV000354615	5	95726972
NM_000439.5(PCSK1):c.*1571A>G	Monogenic Non-Syndromic Obesity|Proprotein convertase 1/3 deficiency	Uncertain significance(Last reviewed: Jun 14, 2016)	VCV000354616	5	95727134
NM_000439.5(PCSK1):c.*1530T>C	Proprotein convertase 1/3 deficiency|Monogenic Non-Syndromic Obesity	Likely benign(Last reviewed: Jun 14, 2016)	VCV000354617	5	95727175
NM_000439.5(PCSK1):c.*1443C>T	Proprotein convertase 1/3 deficiency|Monogenic Non-Syndromic Obesity	Uncertain significance(Last reviewed: Jun 14, 2016)	VCV000354618	5	95727262
NM_000439.5(PCSK1):c.*1414A>C	Proprotein convertase 1/3 deficiency|Monogenic Non-Syndromic Obesity	Uncertain significance(Last reviewed: Jan 13, 2018)	VCV000354619	5	95727291
NM_000439.5(PCSK1):c.*1401C>T	Proprotein convertase 1/3 deficiency|Monogenic Non-Syndromic Obesity	Uncertain significance(Last reviewed: Jan 13, 2018)	VCV000354620	5	95727304
NM_000439.5(PCSK1):c.*1372C>G	Proprotein convertase 1/3 deficiency	Uncertain significance(Last reviewed: Jan 13, 2018)	VCV000906824	5	95727333
NM_000439.5(PCSK1):c.*1333A>T	Proprotein convertase 1/3 deficiency|Monogenic Non-Syndromic Obesity	Uncertain significance(Last reviewed: Jun 14, 2016)	VCV000354621	5	95727372
NM_000439.5(PCSK1):c.*1307A>G	Proprotein convertase 1/3 deficiency	Uncertain significance(Last reviewed: Jan 12, 2018)	VCV000906825	5	95727398
NM_000439.5(PCSK1):c.*1232G>A	Proprotein convertase 1/3 deficiency|Monogenic Non-Syndromic Obesity	Uncertain significance(Last reviewed: Jan 12, 2018)	VCV000354622	5	95727473
NM_000439.5(PCSK1):c.*1231C>T	Proprotein convertase 1/3 deficiency|Monogenic Non-Syndromic Obesity	Uncertain significance(Last reviewed: Jan 12, 2018)	VCV000354623	5	95727474
NM_000439.5(PCSK1):c.*1164T>C	Proprotein convertase 1/3 deficiency|Monogenic Non-Syndromic Obesity	Uncertain significance(Last reviewed: Jun 14, 2016)	VCV000354624	5	95727541
NM_000439.5(PCSK1):c.*1132C>T	Proprotein convertase 1/3 deficiency	Uncertain significance(Last reviewed: Jan 13, 2018)	VCV000907815	5	95727573
NM_000439.5(PCSK1):c.*1097C>A	Proprotein convertase 1/3 deficiency|Monogenic Non-Syndromic Obesity	Uncertain significance(Last reviewed: Jan 13, 2018)	VCV000354625	5	95727608
NM_000439.5(PCSK1):c.*1041T>A	Proprotein convertase 1/3 deficiency|Monogenic Non-Syndromic Obesity	Likely benign(Last reviewed: Jun 14, 2016)	VCV000354626	5	95727664
NM_000439.5(PCSK1):c.*974A>G	Proprotein convertase 1/3 deficiency	Uncertain significance(Last reviewed: Jan 13, 2018)	VCV000907816	5	95727731
NM_000439.5(PCSK1):c.*905T>C	Proprotein convertase 1/3 deficiency|Monogenic Non-Syndromic Obesity	Uncertain significance(Last reviewed: Jun 14, 2016)	VCV000354627	5	95727800
NM_000439.5(PCSK1):c.*837G>A	Proprotein convertase 1/3 deficiency|Monogenic Non-Syndromic Obesity	Uncertain significance(Last reviewed: Jun 14, 2016)	VCV000354628	5	95727868
NM_000439.5(PCSK1):c.*826del	Proprotein convertase 1/3 deficiency|Monogenic Non-Syndromic Obesity	Likely benign(Last reviewed: Jun 14, 2016)	VCV000354629	5	95727879
NM_000439.5(PCSK1):c.*737_*739dup	Proprotein convertase 1/3 deficiency|Monogenic Non-Syndromic Obesity	Likely benign(Last reviewed: Jun 14, 2016)	VCV000354630	5	95727965 - 95727966
NM_000439.5(PCSK1):c.*597T>C	Proprotein convertase 1/3 deficiency|Monogenic Non-Syndromic Obesity	Uncertain significance(Last reviewed: Jun 14, 2016)	VCV000354631	5	95728108
NM_000439.5(PCSK1):c.*471C>G	Proprotein convertase 1/3 deficiency|Monogenic Non-Syndromic Obesity	Uncertain significance(Last reviewed: Jun 14, 2016)	VCV000354632	5	95728234
NM_000439.5(PCSK1):c.*438C>A	Proprotein convertase 1/3 deficiency	Uncertain significance(Last reviewed: Jan 13, 2018)	VCV000904501	5	95728267
NM_000439.5(PCSK1):c.*287A>G	Proprotein convertase 1/3 deficiency|Monogenic Non-Syndromic Obesity	Uncertain significance(Last reviewed: Jan 12, 2018)	VCV000354633	5	95728418
NM_000439.5(PCSK1):c.*265T>C	Proprotein convertase 1/3 deficiency|Monogenic Non-Syndromic Obesity	Benign/Likely benign(Last reviewed: Jan 13, 2018)	VCV000354634	5	95728440
NM_000439.5(PCSK1):c.*262del	Monogenic Non-Syndromic Obesity|Proprotein convertase 1/3 deficiency	Uncertain significance(Last reviewed: Jun 14, 2016)	VCV000354635	5	95728443
NM_000439.5(PCSK1):c.*245G>T	Proprotein convertase 1/3 deficiency	Uncertain significance(Last reviewed: Apr 27, 2017)	VCV000905288	5	95728460
NM_000439.5(PCSK1):c.*170A>T	Proprotein convertase 1/3 deficiency	Uncertain significance(Last reviewed: Jan 12, 2018)	VCV000905289	5	95728535
NM_000439.5(PCSK1):c.*120C>T	Proprotein convertase 1/3 deficiency	Uncertain significance(Last reviewed: Jan 12, 2018)	VCV000905290	5	95728585
NM_000439.5(PCSK1):c.*88G>C	Monogenic Non-Syndromic Obesity|Proprotein convertase 1/3 deficiency	Uncertain significance(Last reviewed: Jan 12, 2018)	VCV000354636	5	95728617
NM_000439.5(PCSK1):c.2253G>A (p.Glu751=)	Monogenic Non-Syndromic Obesity|Proprotein convertase 1/3 deficiency	Uncertain significance(Last reviewed: Jun 14, 2016)	VCV000354637	5	95728714
NM_000439.5(PCSK1):c.2247G>A (p.Leu749=)	Proprotein convertase 1/3 deficiency	Uncertain significance(Last reviewed: Jan 13, 2018)	VCV000906890	5	95728720
NM_000439.5(PCSK1):c.2137C>T (p.Leu713Phe)	Monogenic Non-Syndromic Obesity|Proprotein convertase 1/3 deficiency	Uncertain significance(Last reviewed: Jan 13, 2018)	VCV000354638	5	95728830
NM_000439.5(PCSK1):c.2069G>C (p.Ser690Thr)	Monogenic Non-Syndromic Obesity|Proprotein convertase 1/3 deficiency|not specified	Benign/Likely benign(Last reviewed: Jan 12, 2018)	VCV000354639	5	95728898
NM_000439.5(PCSK1):c.1993C>G (p.Gln665Glu)	Monogenic Non-Syndromic Obesity|Proprotein convertase 1/3 deficiency|not specified	Benign/Likely benign(Last reviewed: Dec 19, 2017)	VCV000354640	5	95728974
NM_000439.5(PCSK1):c.1982G>T (p.Gly661Val)	Proprotein convertase 1/3 deficiency	Uncertain significance(Last reviewed: Jan 13, 2018)	VCV000906891	5	95728985
NM_000439.5(PCSK1):c.1923G>A (p.Leu641=)	Monogenic Non-Syndromic Obesity|Proprotein convertase 1/3 deficiency|not provided	Conflicting interpretations of pathogenicity(Last reviewed: Dec 31, 2019)	VCV000354641	5	95729044
NM_000439.5(PCSK1):c.1918A>G (p.Thr640Ala)	not specified|Proprotein convertase 1/3 deficiency	Uncertain significance(Last reviewed: Apr 27, 2017)	VCV000436278	5	95729049
NM_000439.5(PCSK1):c.1884+13C>G	Proprotein convertase 1/3 deficiency	Uncertain significance(Last reviewed: Jan 12, 2018)	VCV000907878	5	95730555
NM_000439.5(PCSK1):c.1884+11C>T	Proprotein convertase 1/3 deficiency	Uncertain significance(Last reviewed: Jan 12, 2018)	VCV000907879	5	95730557
NM_000439.5(PCSK1):c.1780A>G (p.Thr594Ala)	Proprotein convertase 1/3 deficiency	Uncertain significance(Last reviewed: Apr 27, 2017)	VCV000907880	5	95730672
NM_000439.5(PCSK1):c.1764G>A (p.Lys588=)	Monogenic Non-Syndromic Obesity|Proprotein convertase 1/3 deficiency	Uncertain significance(Last reviewed: Jun 14, 2016)	VCV000354642	5	95730688
NM_000439.5(PCSK1):c.1692A>G (p.Ile564Met)	Proprotein convertase 1/3 deficiency	Uncertain significance(Last reviewed: Aug 22, 2018)	VCV001032360	5	95733070
NM_000439.5(PCSK1):c.1688C>G (p.Pro563Arg)	Proprotein convertase 1/3 deficiency	Likely pathogenic(Last reviewed: Jun 7, 2019)	VCV000807458	5	95733074
NM_000439.5(PCSK1):c.1650T>C (p.Asn550=)	Proprotein convertase 1/3 deficiency|Monogenic Non-Syndromic Obesity|not specified	Benign/Likely benign(Last reviewed: Jan 12, 2018)	VCV000354643	5	95733112
NM_000439.5(PCSK1):c.1503C>T (p.Ile501=)	Monogenic Non-Syndromic Obesity|Proprotein convertase 1/3 deficiency	Uncertain significance(Last reviewed: Jun 14, 2016)	VCV000354644	5	95734668
NM_000439.5(PCSK1):c.1447G>A (p.Gly483Arg)	Proprotein convertase 1/3 deficiency	Pathogenic(Last reviewed: Jul 1, 1997)	VCV000014036	5	95734724
NM_000439.5(PCSK1):c.1414A>G (p.Asn472Asp)	Monogenic Non-Syndromic Obesity|Proprotein convertase 1/3 deficiency	Uncertain significance(Last reviewed: Jun 14, 2016)	VCV000354645	5	95735673
NM_000439.5(PCSK1):c.1405G>A (p.Val469Ile)	Proprotein convertase 1/3 deficiency|not provided	Uncertain significance(Last reviewed: Feb 6, 2018)	VCV000432315	5	95735682
NM_000439.5(PCSK1):c.1346T>C (p.Leu449Pro)	Proprotein convertase 1/3 deficiency	Likely pathogenic(Last reviewed: Jun 7, 2019)	VCV000807459	5	95735741
NM_000439.5(PCSK1):c.1345C>G (p.Leu449Val)	Proprotein convertase 1/3 deficiency	Uncertain significance(Last reviewed: Apr 28, 2017)	VCV000904569	5	95735742
NM_000439.5(PCSK1):c.1197-9C>T	Monogenic Non-Syndromic Obesity|Proprotein convertase 1/3 deficiency|not provided	Conflicting interpretations of pathogenicity(Last reviewed: Dec 31, 2019)	VCV000354646	5	95735899
NM_000439.5(PCSK1):c.1196+10A>G	Monogenic Non-Syndromic Obesity|Proprotein convertase 1/3 deficiency	Uncertain significance(Last reviewed: Jan 12, 2018)	VCV000354647	5	95743917
NM_000439.5(PCSK1):c.1179T>C (p.Ala393=)	Monogenic Non-Syndromic Obesity|Proprotein convertase 1/3 deficiency	Uncertain significance(Last reviewed: Jun 14, 2016)	VCV000354648	5	95743944
NM_000439.5(PCSK1):c.1146G>A (p.Ser382=)	Proprotein convertase 1/3 deficiency	Uncertain significance(Last reviewed: Apr 28, 2017)	VCV000904570	5	95743977
NM_000439.5(PCSK1):c.1096-10C>T	Monogenic Non-Syndromic Obesity|Proprotein convertase 1/3 deficiency	Uncertain significance(Last reviewed: Jan 13, 2018)	VCV000354649	5	95744037
NM_000439.5(PCSK1):c.1071C>T (p.Ser357=)	Proprotein convertase 1/3 deficiency|not provided	Conflicting interpretations of pathogenicity(Last reviewed: Dec 31, 2019)	VCV000712066	5	95746502
NM_000439.5(PCSK1):c.1030G>A (p.Ala344Thr)	Proprotein convertase 1/3 deficiency	Uncertain significance(Last reviewed: Jan 13, 2018)	VCV000905357	5	95746543
NM_000439.5(PCSK1):c.993C>T (p.Ile331=)	Proprotein convertase 1/3 deficiency	Uncertain significance(Last reviewed: Jan 12, 2018)	VCV000905358	5	95746580
NM_000439.5(PCSK1):c.958G>C (p.Asp320His)	Proprotein convertase 1/3 deficiency	Uncertain significance(Last reviewed: May 28, 2019)	VCV000802128	5	95746615
NM_000439.5(PCSK1):c.945T>C (p.Asp315=)	Proprotein convertase 1/3 deficiency	Uncertain significance(Last reviewed: Jan 13, 2018)	VCV000905359	5	95746628
NM_000439.5(PCSK1):c.927C>T (p.Asn309=)	Proprotein convertase 1/3 deficiency	Uncertain significance(Last reviewed: Jan 13, 2018)	VCV000905360	5	95746646
NM_000439.5(PCSK1):c.920C>T (p.Ser307Leu)	Proprotein convertase 1/3 deficiency	Pathogenic(Last reviewed: Sep 1, 2007)	VCV000014041	5	95746653
NM_000439.5(PCSK1):c.748G>T (p.Glu250Ter)	Proprotein convertase 1/3 deficiency	Pathogenic(Last reviewed: Nov 1, 2003)	VCV000014038	5	95748156
NM_000439.5(PCSK1):c.709+11G>A	Monogenic Non-Syndromic Obesity|Proprotein convertase 1/3 deficiency	Uncertain significance(Last reviewed: Jan 13, 2018)	VCV000354650	5	95751726
NM_000439.5(PCSK1):c.661A>G (p.Asn221Asp)	not specified|Body mass index quantitative trait locus 12	Benign(Last reviewed: Jan 18, 2018)	VCV000014040	5	95751785
NM_000439.5(PCSK1):c.638_640del (p.Ala213del)	Proprotein convertase 1/3 deficiency	Pathogenic(Last reviewed: Nov 1, 2003)	VCV000014039	5	95751806 - 95751808
NM_000439.5(PCSK1):c.624C>T (p.His208=)	Proprotein convertase 1/3 deficiency	Uncertain significance(Last reviewed: Jan 12, 2018)	VCV000906970	5	95751822
NM_000439.5(PCSK1):c.620+4A>C	Proprotein convertase 1/3 deficiency	Pathogenic(Last reviewed: Jul 1, 1997)	VCV000014037	5	95757580
NM_000439.5(PCSK1):c.612C>T (p.Asn204=)	Monogenic Non-Syndromic Obesity|Proprotein convertase 1/3 deficiency	Likely benign(Last reviewed: Jun 14, 2016)	VCV000354651	5	95757592
NM_000439.5(PCSK1):c.559T>C (p.Tyr187His)	Proprotein convertase 1/3 deficiency	Uncertain significance(Last reviewed: Jan 13, 2018)	VCV000906971	5	95757645
NM_000439.5(PCSK1):c.541T>C (p.Tyr181His)	Proprotein convertase 1/3 deficiency	Uncertain significance(Last reviewed: Apr 27, 2017)	VCV000906972	5	95759019
NM_000439.5(PCSK1):c.524C>T (p.Thr175Met)	Proprotein convertase 1/3 deficiency	Uncertain significance(Last reviewed: Apr 28, 2017)	VCV000906973	5	95759036
NM_000439.5(PCSK1):c.397-10T>C	Monogenic Non-Syndromic Obesity|not provided|Proprotein convertase 1/3 deficiency	Conflicting interpretations of pathogenicity(Last reviewed: Dec 31, 2019)	VCV000354652	5	95759173
NM_000439.5(PCSK1):c.375G>A (p.Met125Ile)	Proprotein convertase 1/3 deficiency	Uncertain significance(Last reviewed: Aug 25, 2017)	VCV000906974	5	95761545
NM_000439.5(PCSK1):c.284G>A (p.Arg95His)	Monogenic Non-Syndromic Obesity|Proprotein convertase 1/3 deficiency	Uncertain significance(Last reviewed: Jan 12, 2018)	VCV000354653	5	95764918
NM_000439.5(PCSK1):c.238C>T (p.Arg80Ter)	Proprotein convertase 1/3 deficiency	Pathogenic(Last reviewed: Jan 21, 2021)	VCV000995956	5	95764964
NM_000439.5(PCSK1):c.121G>A (p.Gly41Arg)	Proprotein convertase 1/3 deficiency	Uncertain significance(Last reviewed: Jan 12, 2018)	VCV000907946	5	95768626
NM_000439.5(PCSK1):c.-21G>A	Monogenic Non-Syndromic Obesity|Proprotein convertase 1/3 deficiency	Uncertain significance(Last reviewed: Jun 14, 2016)	VCV000354654	5	95768767
NM_000439.5(PCSK1):c.-96C>T	Monogenic Non-Syndromic Obesity|Proprotein convertase 1/3 deficiency	Uncertain significance(Last reviewed: Jan 13, 2018)	VCV000354655	5	95768842
NM_000439.5(PCSK1):c.-101T>C	Monogenic Non-Syndromic Obesity|Proprotein convertase 1/3 deficiency	Benign/Likely benign(Last reviewed: Jan 13, 2018)	VCV000354656	5	95768847
NM_000439.5(PCSK1):c.-137A>G	Monogenic Non-Syndromic Obesity|Proprotein convertase 1/3 deficiency	Uncertain significance(Last reviewed: Jun 14, 2016)	VCV000354657	5	95768883
NM_000439.5(PCSK1):c.-140C>T	Monogenic Non-Syndromic Obesity|Proprotein convertase 1/3 deficiency	Uncertain significance(Last reviewed: Jun 14, 2016)	VCV000354658	5	95768886
NM_000439.5(PCSK1):c.-147C>G	Monogenic Non-Syndromic Obesity|Proprotein convertase 1/3 deficiency	Uncertain significance(Last reviewed: Jun 14, 2016)	VCV000354659	5	95768893
